# Supplementary material for: Abundance and co-occurrence of extracellular capsules increase environmental breadth: Implications for the emergence of pathogens
Source: PLOS journal article supplement (doi:10.1371/journal.ppat.1006525), 2017-07-24
Supplement: S10 (10.1371/journal.ppat.1006525.s010) [file journal.ppat.1006525.s010]

| <b>Environment</b> | <b>Subenvironment</b> | <b># of Metagenomes</b> | <b># of identified Species</b> |
|--------------------|-----------------------|-------------------------|--------------------------------|
| Air                | Indoor                | 8                       | 489                            |
| Host               | Animal                | 2015                    | 907                            |
| Host               | Aquatic organisms     | 3                       | 17                             |
| Host               | Arthropod             | 2                       | 2                              |
| Host               | Human                 | 2631                    | 935                            |
| Host               | Mammal                | 183                     | 304                            |
| Host               | Mixed                 | 10                      | 149                            |
| Host               | Other                 | 15                      | 131                            |
| Host               | Plant                 | 170                     | 578                            |
| Host               | U                     | 295                     | 798                            |
| Soil               | Agricultural          | 9                       | 311                            |
| Soil               | Desert                | 41                      | 507                            |
| Soil               | Forest                | 600                     | 622                            |
| Soil               | Grasslands            | 449                     | 731                            |
| Soil               | Host-associated       | 2                       | 121                            |
| Soil               | Tundra                | 35                      | 212                            |
| Soil               | U                     | 178                     | 901                            |
| Water              | Freshwater            | 52                      | 514                            |
| Water              | House-associated      | 2                       | 728                            |
| Water              | Marine                | 1                       | 5                              |
| Water              | Spring                | 29                      | 475                            |
| Water              | U                     | 2                       | 265                            |

U for undefined
